# Supplementary material
Source: bioRxiv or medRxiv preprint supplement (http://medrxiv.stage.highwire.org/highwire/filestream/84097/field_highwire_adjunct_files/4/2020.05.29.20116525-5.pdf)
Supplement: Supplementary file [file 2020.05.29.20116525-5.pdf]

**E-TABLE 5: Socio-demographic risk factors for adolescents aged 13 to 17 years self-reported smoking of any type and frequency, sensitivity analysis including highest parental education (N=799).**

|                               | Crude |             | Adjusted |             |
|-------------------------------|-------|-------------|----------|-------------|
|                               | OR    | (95% CI)    | aOR      | (95% CI)    |
| Age, per year increase        | 2.0   | (1.7 - 2.2) | 1.8      | (1.5 - 2.1) |
| Sex, male                     | 1.9   | (1.5 - 2.3) | 2.2      | (1.6 - 3.0) |
| Socioeconomic position index  | 0.9   | (0.8 - 1.0) | 1.0      | (0.8 - 1.1) |
| Urbanization degree           |       |             |          |             |
| Large urban area              | 1.4   | (1.2 - 1.8) | 1.0      | (0.7 - 1.5) |
| Small urban area              | ref.  |             | ref.     |             |
| Rural area                    | 1.4   | (0.9 - 2.1) | 1.4      | (0.8 - 2.3) |
| Paternal highest education    |       |             |          |             |
| Elementary school             | 1.5   | (0.9 - 2.3) | 1.2      | (0.7 - 2.2) |
| Professional school           | 1.3   | (0.9 - 1.8) | 1.1      | (0.7 - 1.6) |
| Business or technical school  | 1.1   | (0.7 - 1.7) | 1.0      | (0.6 - 1.6) |
| Teaching degree or university | ref.  |             | ref.     |             |
| Maternal highest education    |       |             |          |             |
| Elementary school             | 1.4   | (0.9 - 2.1) | 1.0      | (0.6 - 1.8) |
| Professional school           | 1.3   | (0.9 - 1.9) | 1.1      | (0.7 - 1.7) |
| Business or technical school  | 1.2   | (0.7 - 1.8) | 1.0      | (0.6 - 1.7) |
| Teaching degree or university | ref.  |             | ref.     |             |
| Paternal current smoking      | 1.6   | (1.3 - 2.0) | 1.5      | (1.0 - 2.1) |
| Maternal current smoking      | 1.9   | (1.5 - 2.5) | 1.5      | (1.0 - 2.3) |

OR: odds ratio. aOR: adjusted odds ratio. CI: confidence interval. The multivariable model includes all the variables in the table.
